# Supplementary material for: Revealing the distribution of transmembrane currents along the dendritic tree of a neuron from extracellular recordings
Source: eLife journal article supplement (doi:10.7554/elife.29384), 2017-11-17
Supplement: supp [file elife-29384-supp-v1.zip]

Archive with 3 entries (3 files):
- elife_poa_e29384_Transparent_Reporting_File.pdf
- elife_poa_e29384_Video_S1.mp4
- elife_poa_e29384_Video_S2.mp4
